# Supplementary material
Source: publisher figshare collection journal article supplement (https://karger.figshare.com/articles/dataset/_/3830565)
Supplement: Supplementary file 1 [file 1]

Archive with 2 entries (2 files):
- 448080_sm1.docx
- 448080_sm2.pdf
