# Supplementary material
Source: publisher figshare collection journal article supplement (https://karger.figshare.com/articles/dataset/_/3830565)
Supplement: Supplementary file 1 [file 1 › 448080_sm1.docx]

**Supplementary material**

**Problems with exact slicing of brains according to Orthner**

Orthner had observed that either the tissue, depending on its properties, evades from the knife, or thin knifes may be bent depending on the texture of particular brain regions [44]. Thicker, wedge-shaped knifes, on the other hand, were associated with greater variations with regard to the direction of the cut, and slice thickness was very much dependent on the pressure exerced on the tissue by the cut face. Furthermore, a major concern was the inevitable deformation of the hand-held brain.

**Protocol for brain processing and use of the Göttinger macrotome**

Brain processing for the Göttinger macrotome had been decribed in great detail and only the relevant steps will be reviewed [41,44,46]. Brains were taken as fresh as possible to ensure proper staining and were fixed suspended from the basilar artery. They floated freely in 4% formaldehyde containing 1.5% saline [72], a formula that Orthner found to result in least shrinking. The volume and weight of the brain was determined after each step in an overflow vessel with siphon. The brains were mediosagittally cut, photographed, and the length from the anterior to the posterior commissure was measured defining the 'Ho' plane. The 'Fo' plane perpendicularly intersecting the Ho plane at the posterior rim of AC was defined. Thus, the commissure-based reference system introduced by Talairach et al. [22] was adopted by Orthner. Coordinates were referenced to the posterior rim of the anterior commissure (x=0; y=0; z=0) and the intercommissural plane. Positive x-values indicated a position posterior (occipital) to AC; positive y-values a lateral position directing to the right; and positive z-values a position cranial (superior) to AC.

The brains were mounted in a mixture from gelatine ('Schwerigal'; named after the developer Mr. Schwerin) and placed into the macrotome. The planes were aligned to a grid carved into the glass slab that was visualized from the bottomwith the help of mirrors installed underneath the apparatus (Fig. 3). The mandoline strings in the sectioning lyra were screwed up and used to slice the brains with slight oscillating movements. Slices submerged by water were photographed with a magnification of 1:1 or 1:2 (for basal ganglia). The thickness of the slices was 4 mm (total of 45 strings). Slicing could also be performed with a slice thickness of 2 mm that was mostly performed on smaller blocks of the basal ganglia and for the hypothalamic region (D.M., personal communication). Although, slicing in the coronal orientation was preferred the macrotome could be modified to generate axial and sagittal brain sections.

Orthner found that immersion fixation was more reliable than intravasal fixation that had been used, for example, by Spiegel et al. and Talairach et al. [41]. The latter was not performed because it could not prevent alterations in shape and weight and the exact volume could not be determined. In fact, post mortem clotting of venous outflow from the brain rendered fixation difficult and unreliable (e.g. swelling). Interestingly, later Van Buren and Maccubbin as well as Slaughter and Bashold came to the same conclusion as Orthner. Later both groups independently worked out procedures that resembled the one used in Göttingen with respect to: (i) immersion fixation; (ii) suspending brains from the basilar artery; (iii) embedding brains before slicing [43,47].

**Stereotactic planning**

Individual stereotactic planning started by selecting a 'model brain combination' for a given patient. To this end, in a first step, head and ventricle measurements obtained from ventriculograms were classified. A number between 1 and 9 was assigned to each of these measurements. Each number stood for values within a certain range. For example, a patient with an AC-PC distance of 22 mm was classified as VL5 that represented a ventricular length between 21.3 and 22.8 mm in brains of patients and the atlas. The same was performed for the other values of the 'head-ventricle-formula.' The actual 'head-ventricle-formula' (VL5 etc.) of the patient was compared with those of the 'model brain combinations.' The 'model brain combination' selected for further planning ought to represent the best match for a given patient. Nonetheless, selection of the 'best' 'model brain combination' remained somewhat subjective as a 'model brain combination' matching the patient's brain with respect to all measures was not always found.

**Stereotactic calculations**

Calculations (based on deci-millimetre as unit of measure) were performed by two colleagues checking each other. They used spreadsheets for frequently used angles containing about 300,000 values (prepared by W. Sendler, Hollerith Department of the Max Planck Institute in Göttingen in cooperation with D. Müller et al.; Suppl. Fig. 10). Later a programmed calculator (Hewlett-Packard desk calculator 9815A) was used in Göttingen and also in Hamburg by D. Müller [29]. While the coagulation program for the first set of stimulation and coagulation was calculated the surgical procedure started with simulation of the procedure on the phantom, then burr hole trephination, insertion of the probe, and control X-ray imaging. The stimulation/coagulation program was adjusted when the actual position of the probe (intraoperative X-ray) deviated from the intended position by >1/10 mm.
